# Supplementary material for: Seismic Evidence for Sustained Gas Migration in a Serpentinizing Aquifer
Source: Research Square preprint supplement (doi:10.21203/rs.3.rs-7217354/v1), 2025-08-13
Supplement: Supplementary file 1 [file 15483fece74250d887723569.docx]

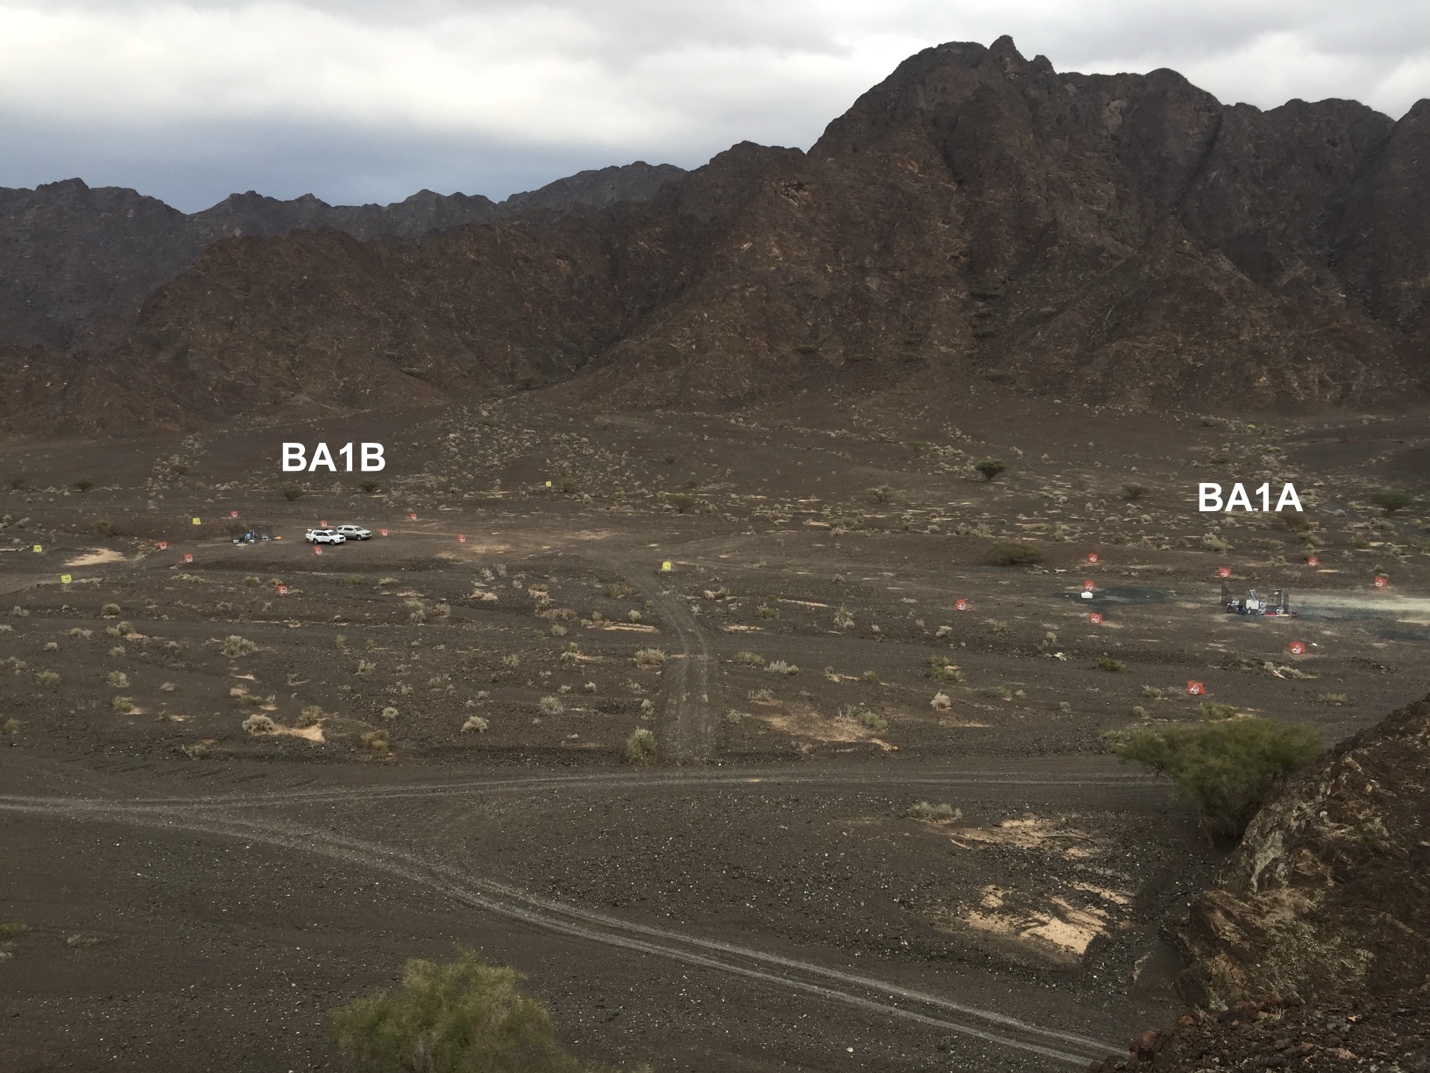


**Fig. S1.** Photo of the study site showing the location of boreholes BA1A and BA1B and the geophones in Wadi Lawayni. The surface expressions of the PASSCAL BIHO geophones (case and solar panel) are surrounded by orange or yellow plastic fencing to prevent interference. Chain link fences, installed for protection, are visible around both boreholes.


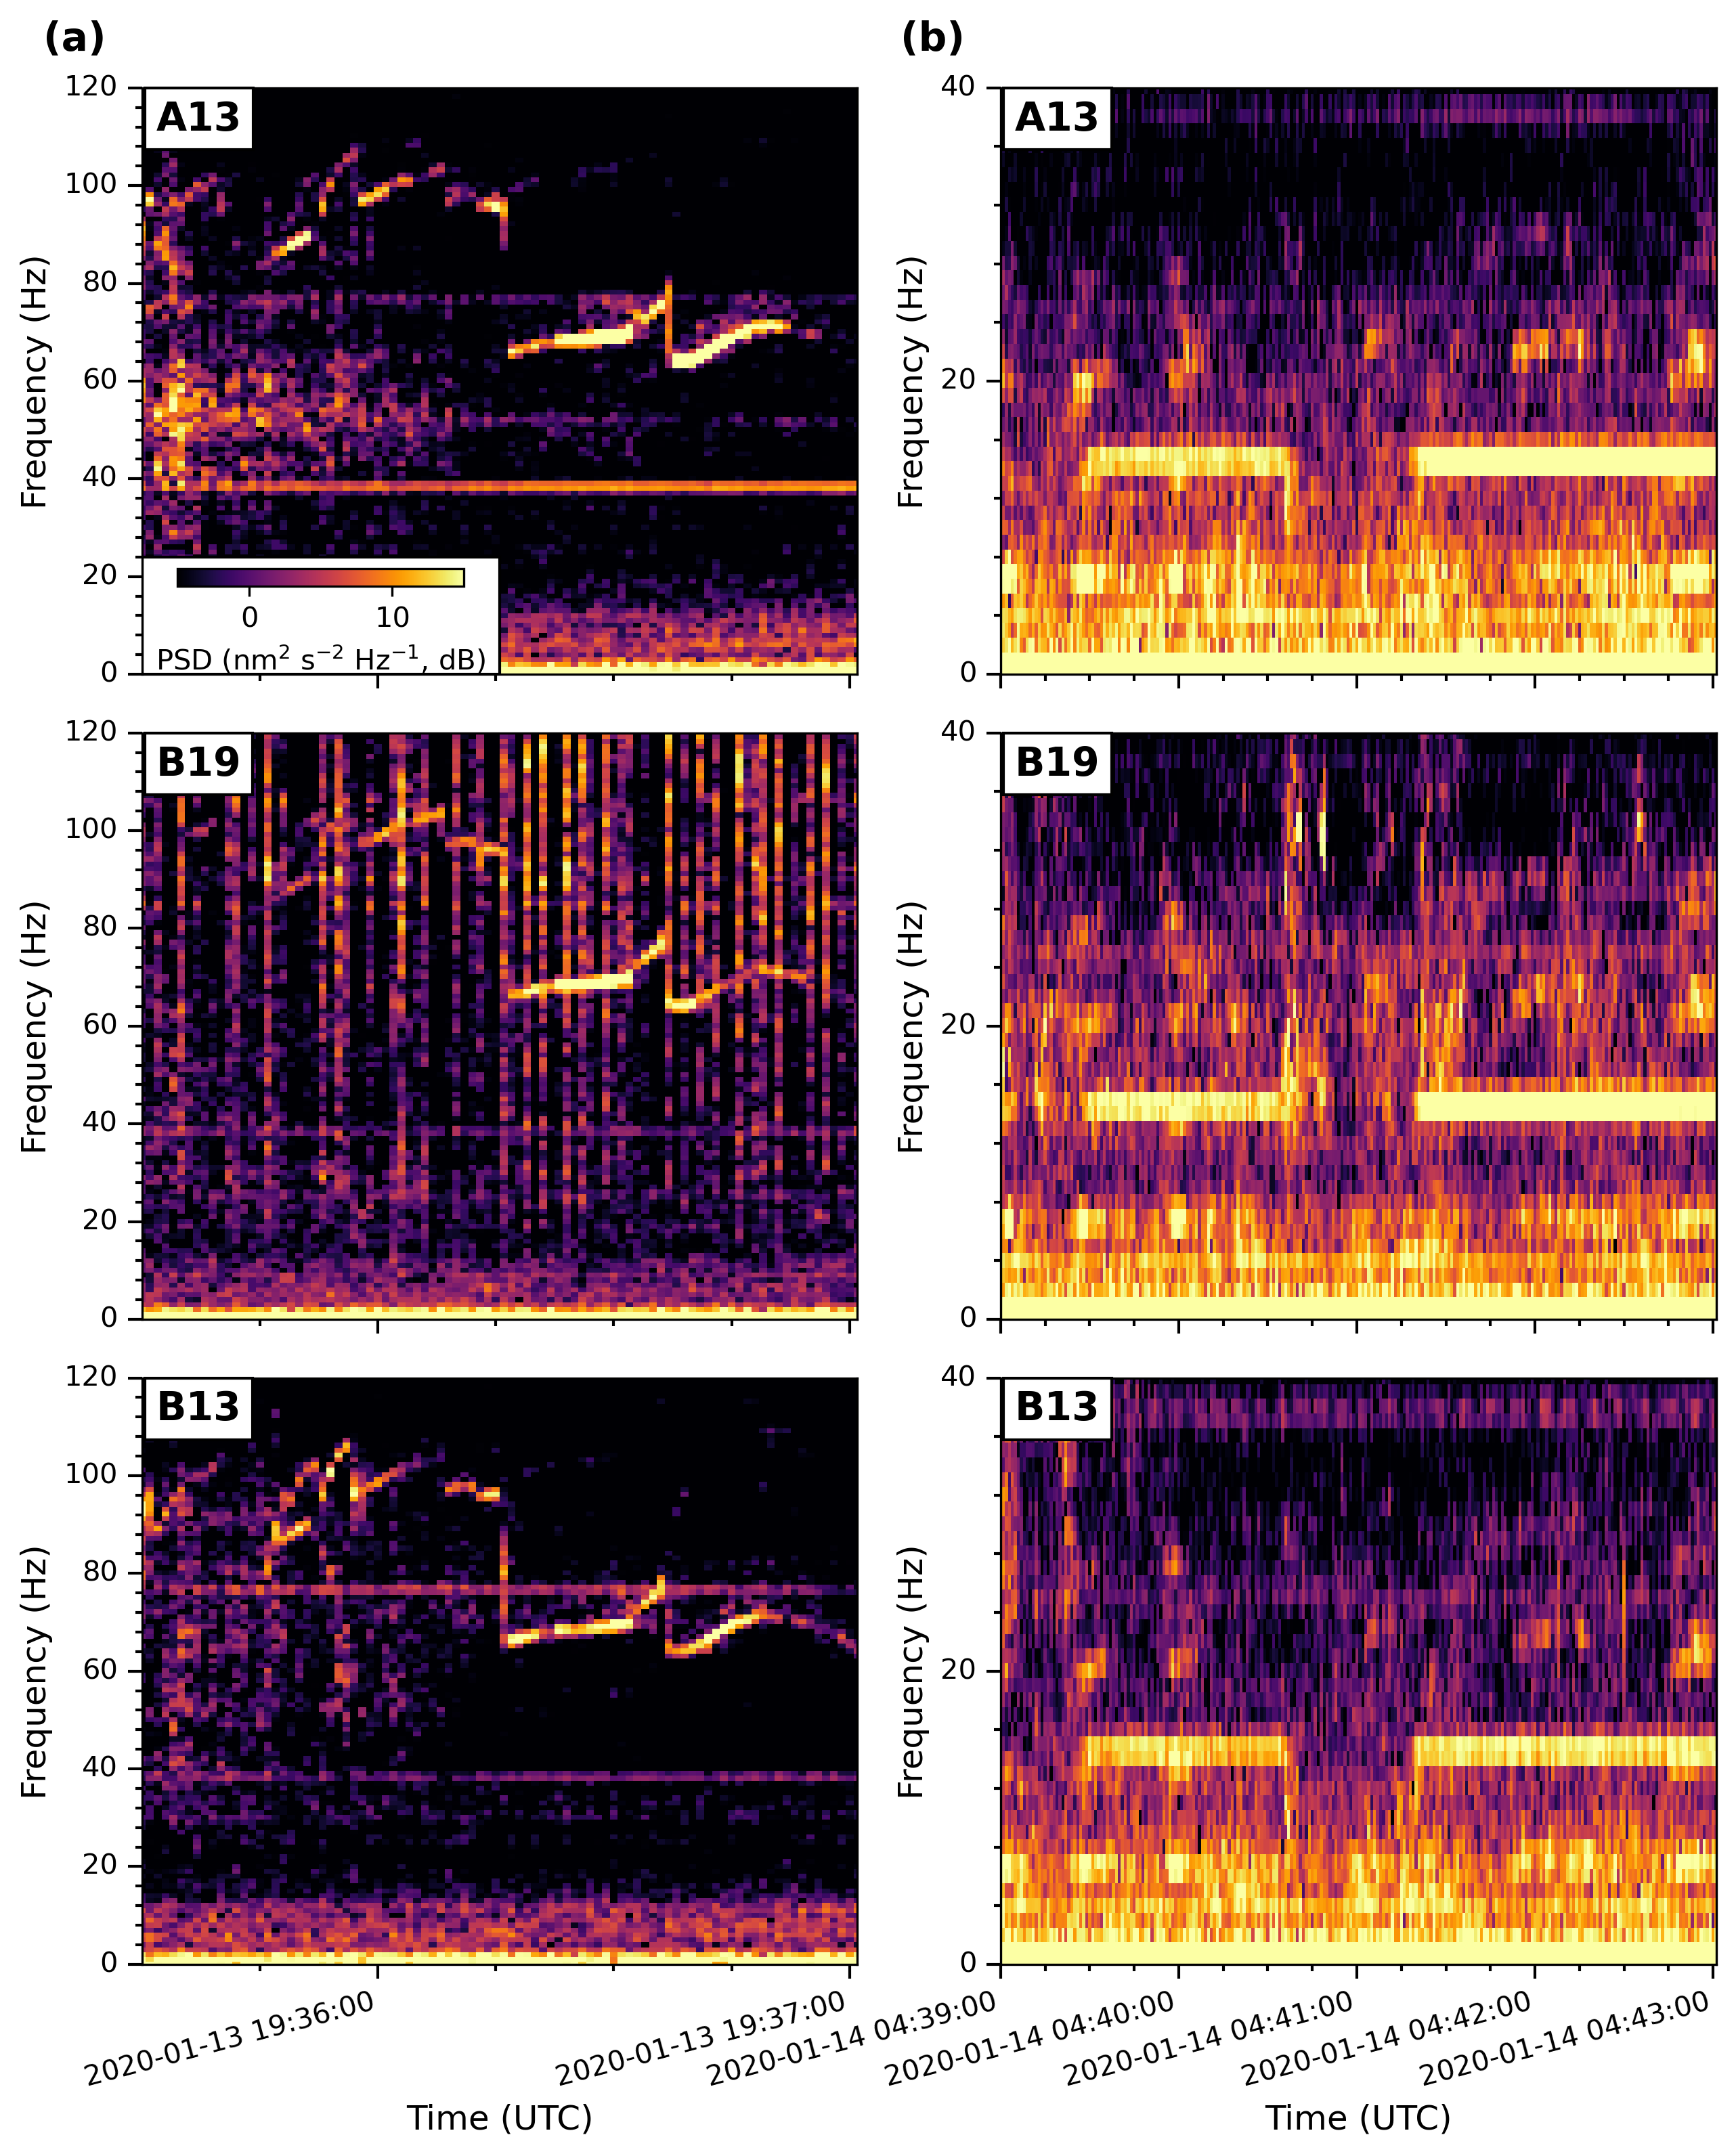


**Fig. S2.** Transient resonances are ubiquitous in the geophone data. Here we show examples of (a) a resonance with strong frequency gliding and (b) one without, recorded on geophones A13, B19, and B13 (Fig. 1a). The same color scale is used for all panels.


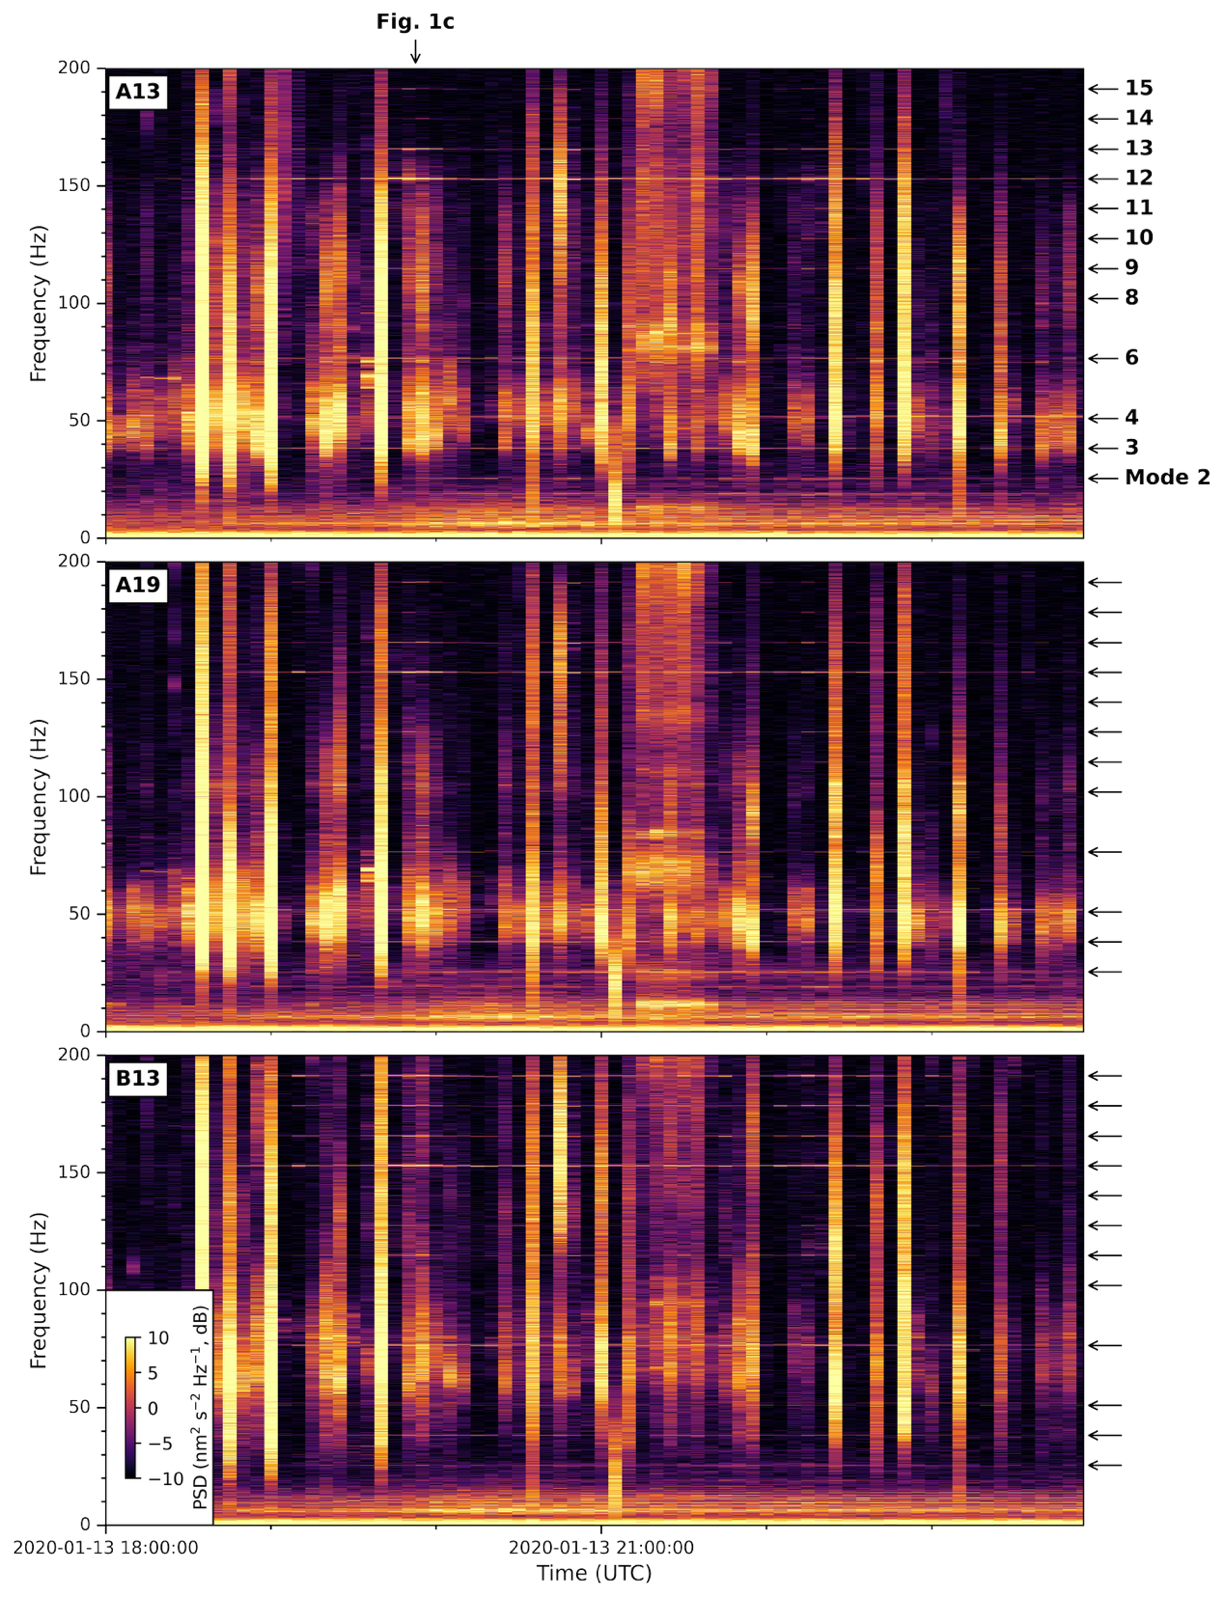


**Fig. S3.** Spectrograms of A13, A19, and B03 for UTC 18:00:00–24:00:00 of Jan 13, 2020. Arrows mark the frequencies of the harmonic modes and the time window shown in Fig. 1c.


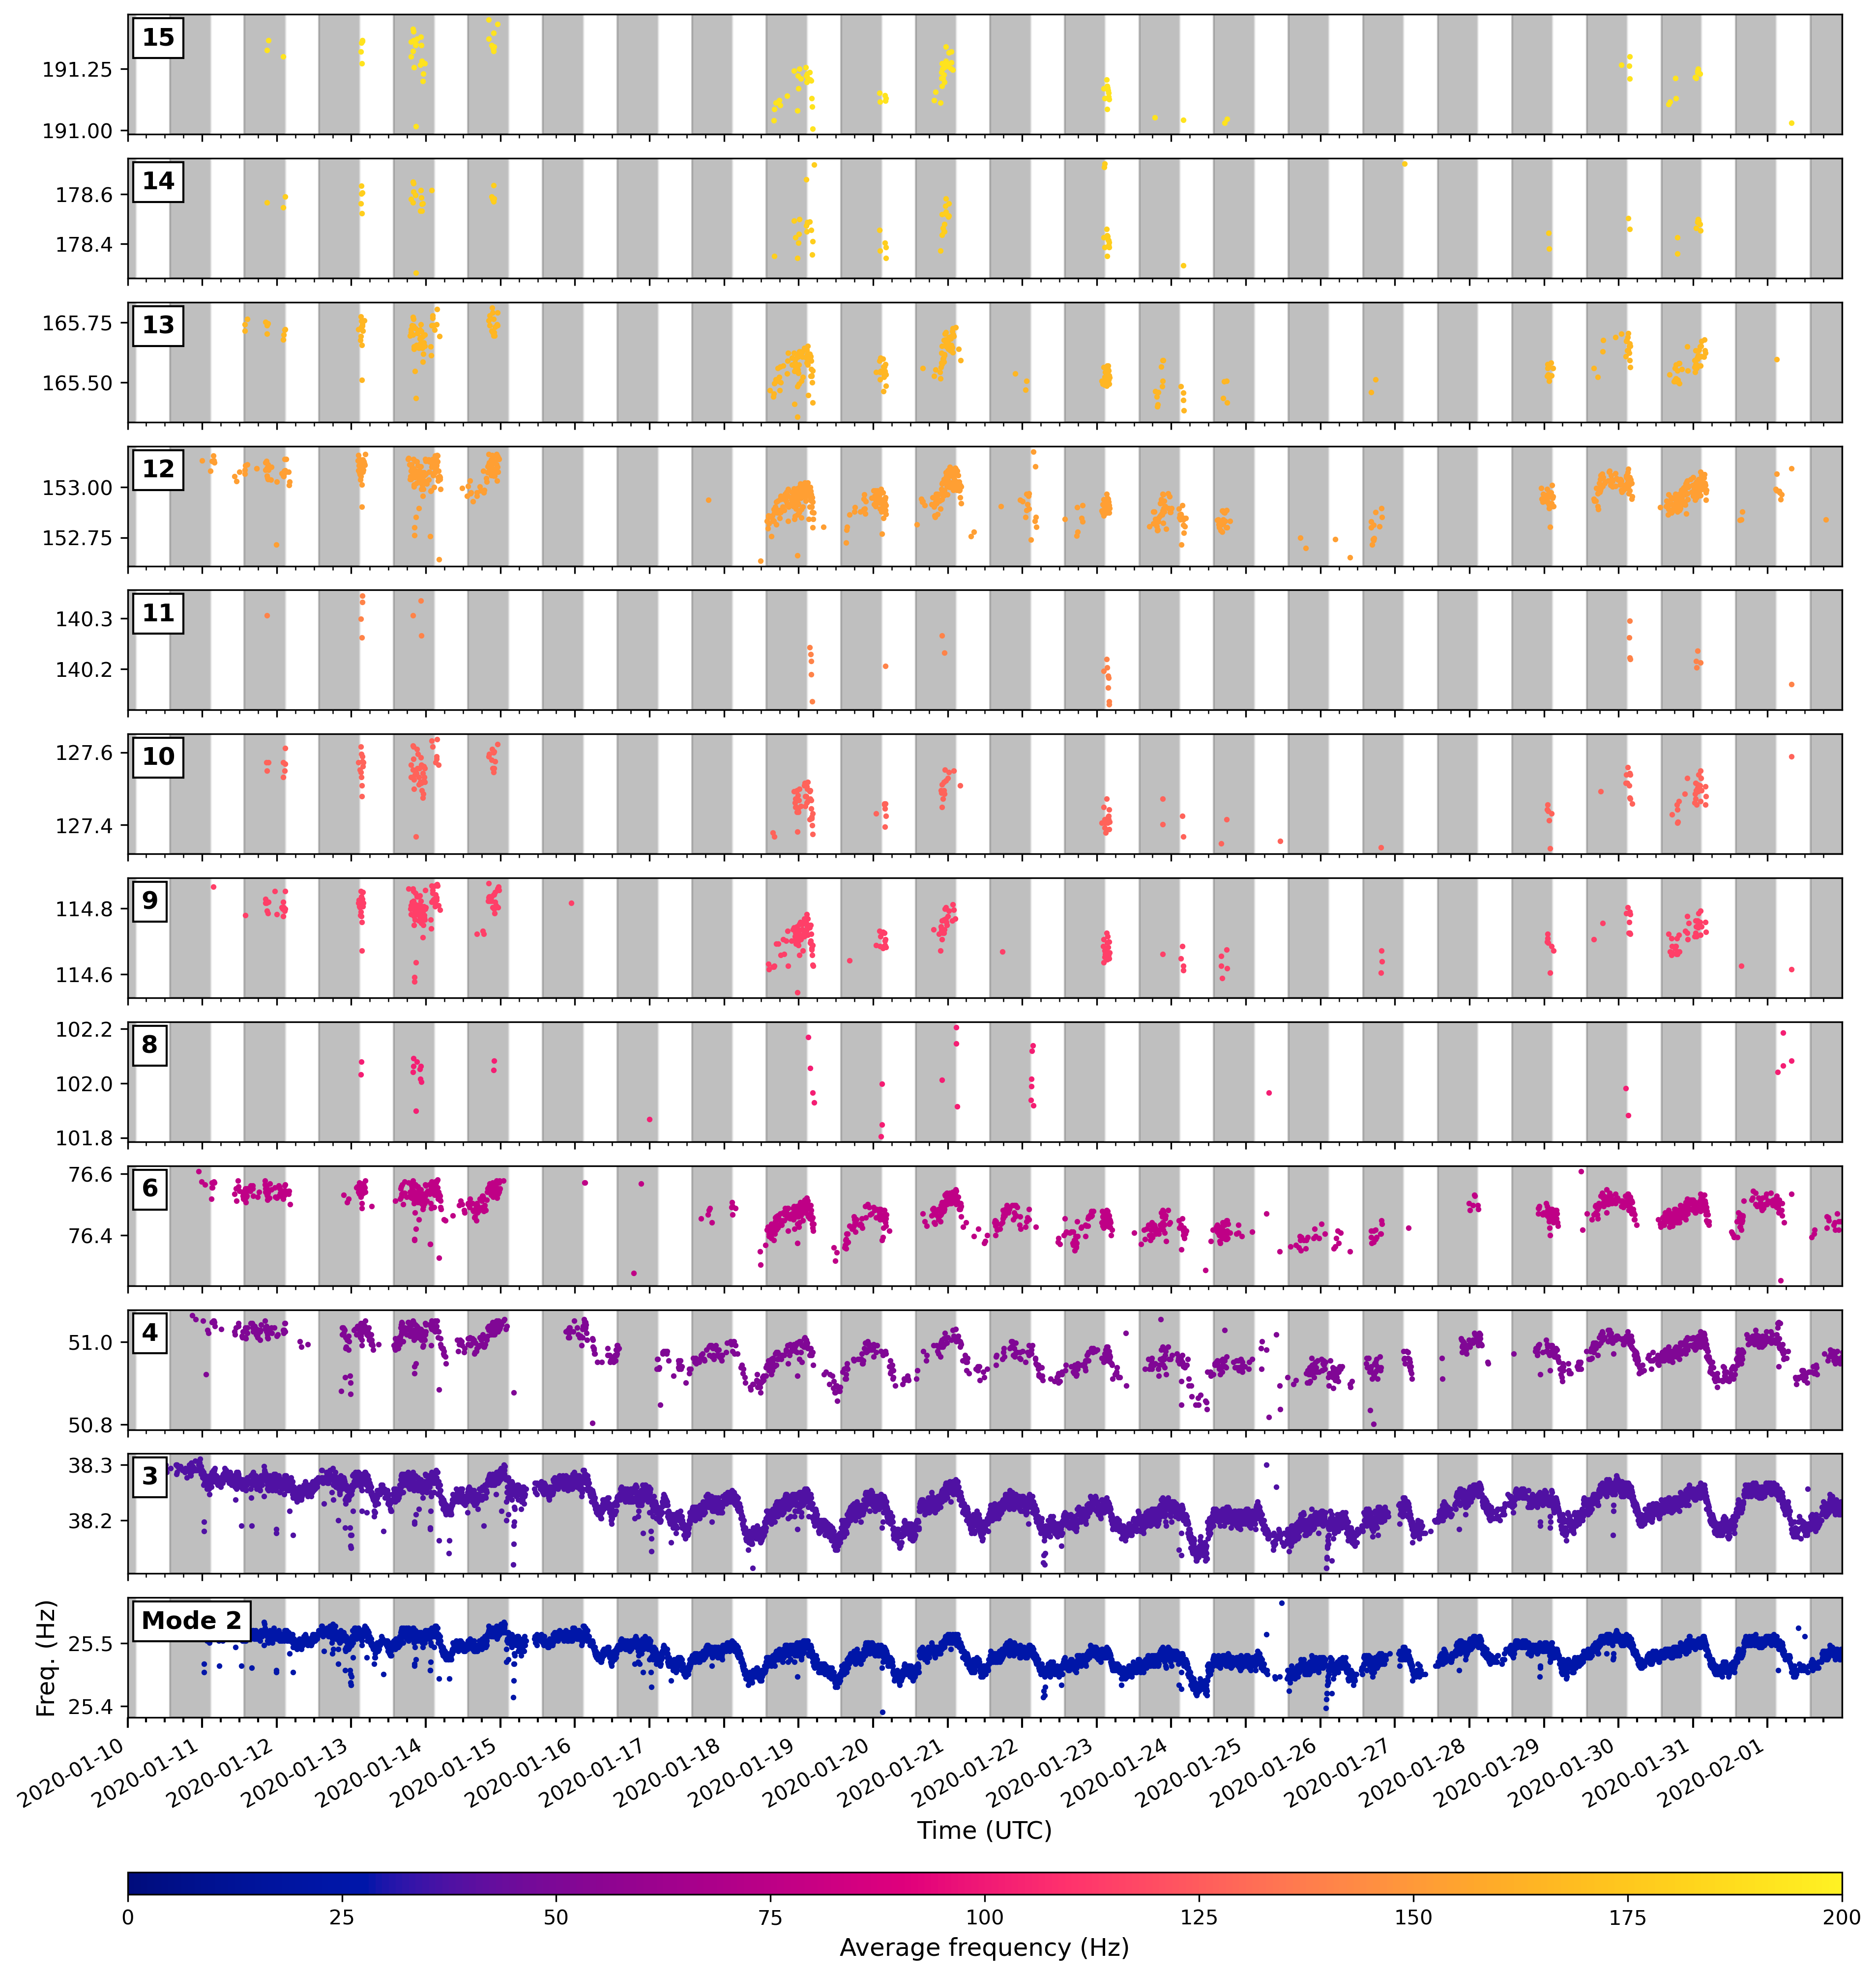
**Fig. S4.** Frequency as a function of time for all modes detected from geophone spectrograms. Each dot represents a detection of the mode (Materials and Methods) and is colored by the average frequency of the mode. White and gray stripes indicate daytime and nighttime intervals, respectively.


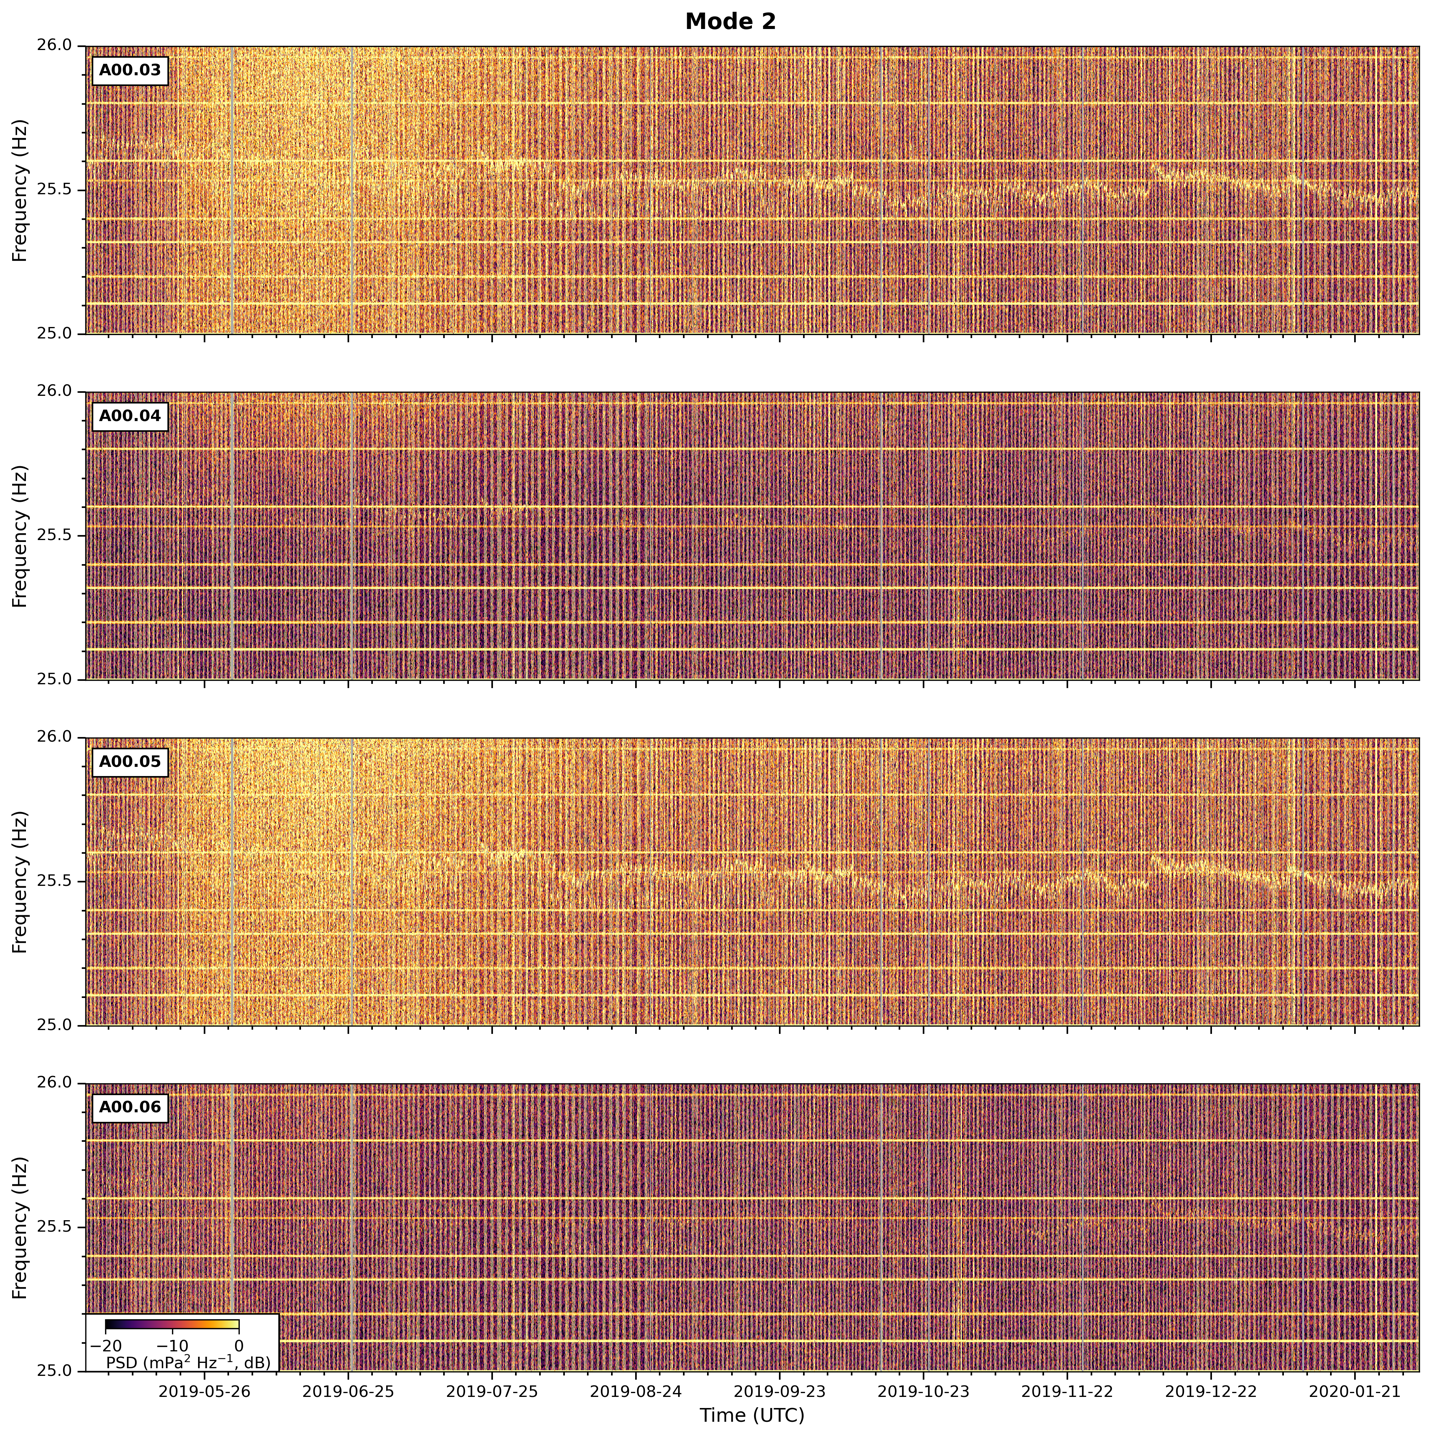
**Fig. S5.** Nine-month spectrograms of Mode 2 on hydrophones A00.03–06 in BA1A. The color scale is adjusted from Fig. 2 to enhance the signal visibility on Hydrophones 04 and 06, where the signal-to-noise ratio is low.


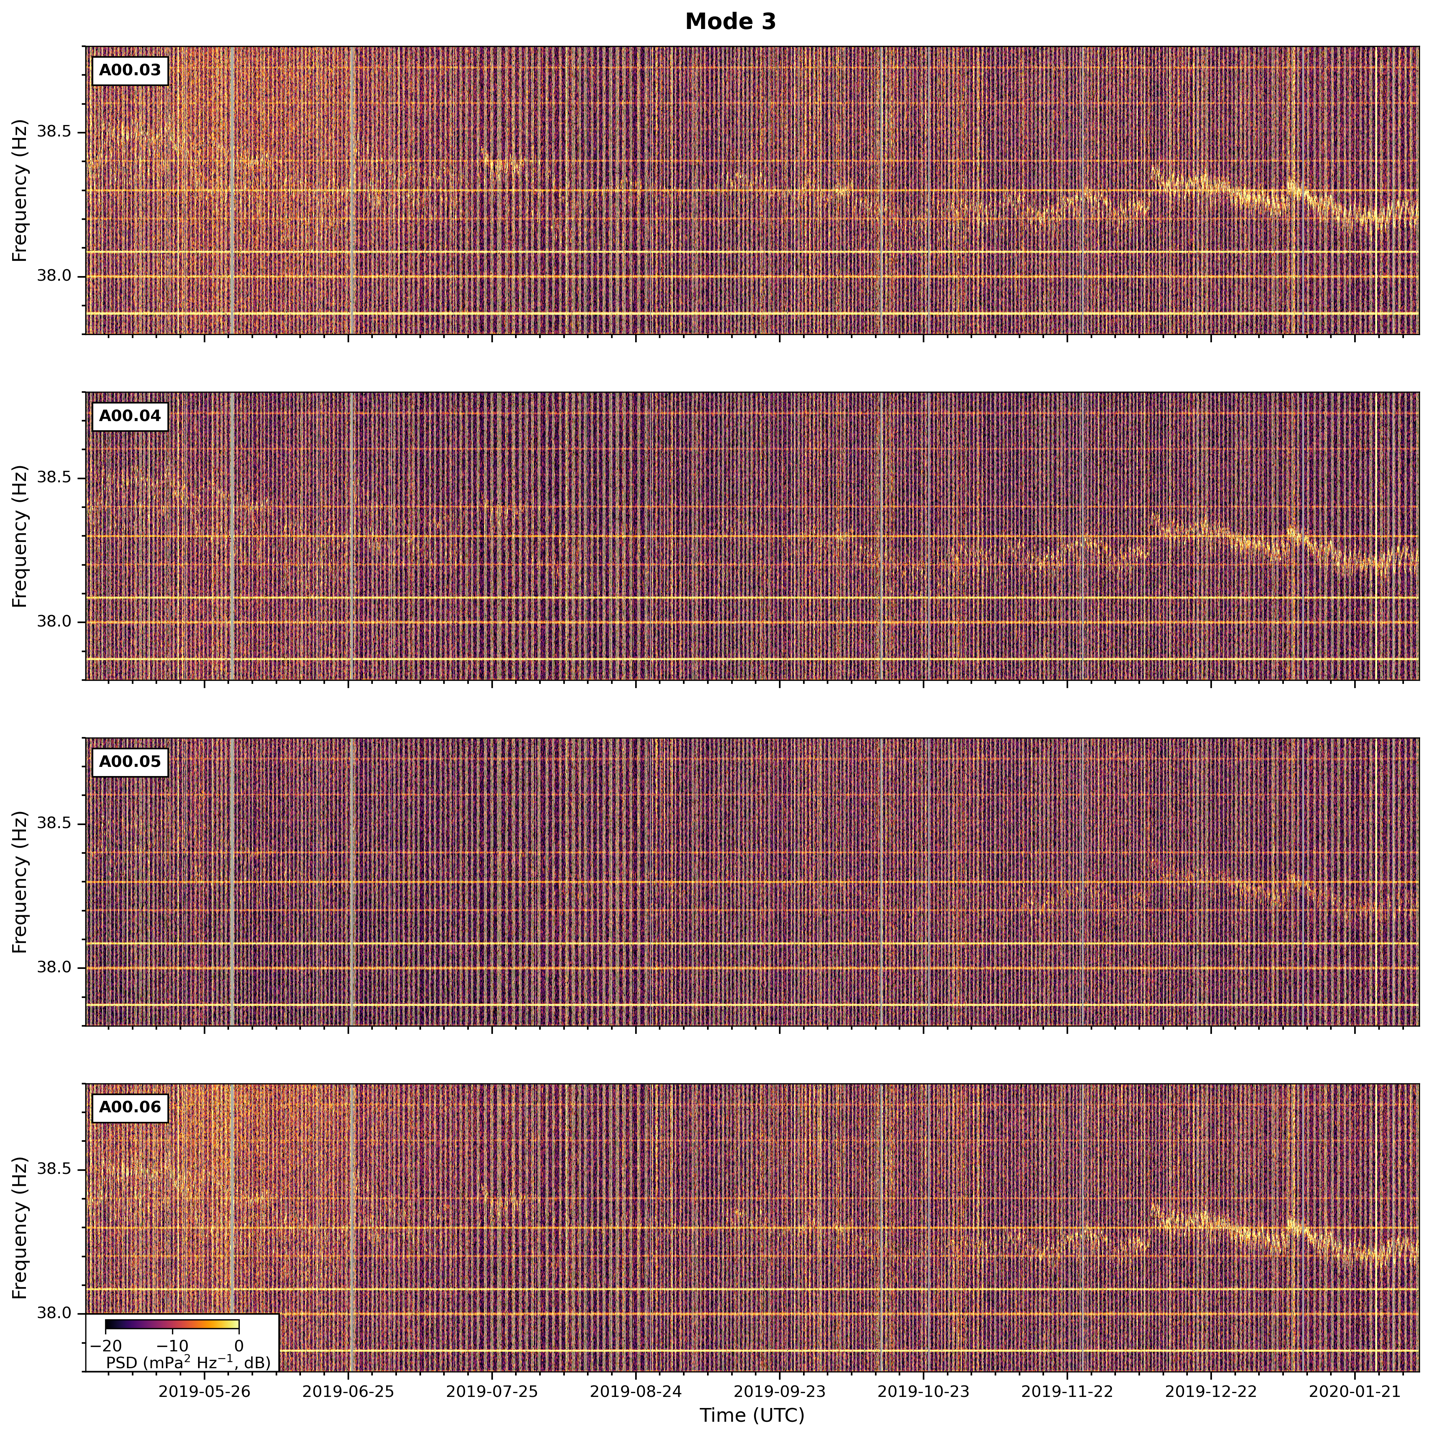
Fig. S6. Same as Fig. S4, but for Mode 3.


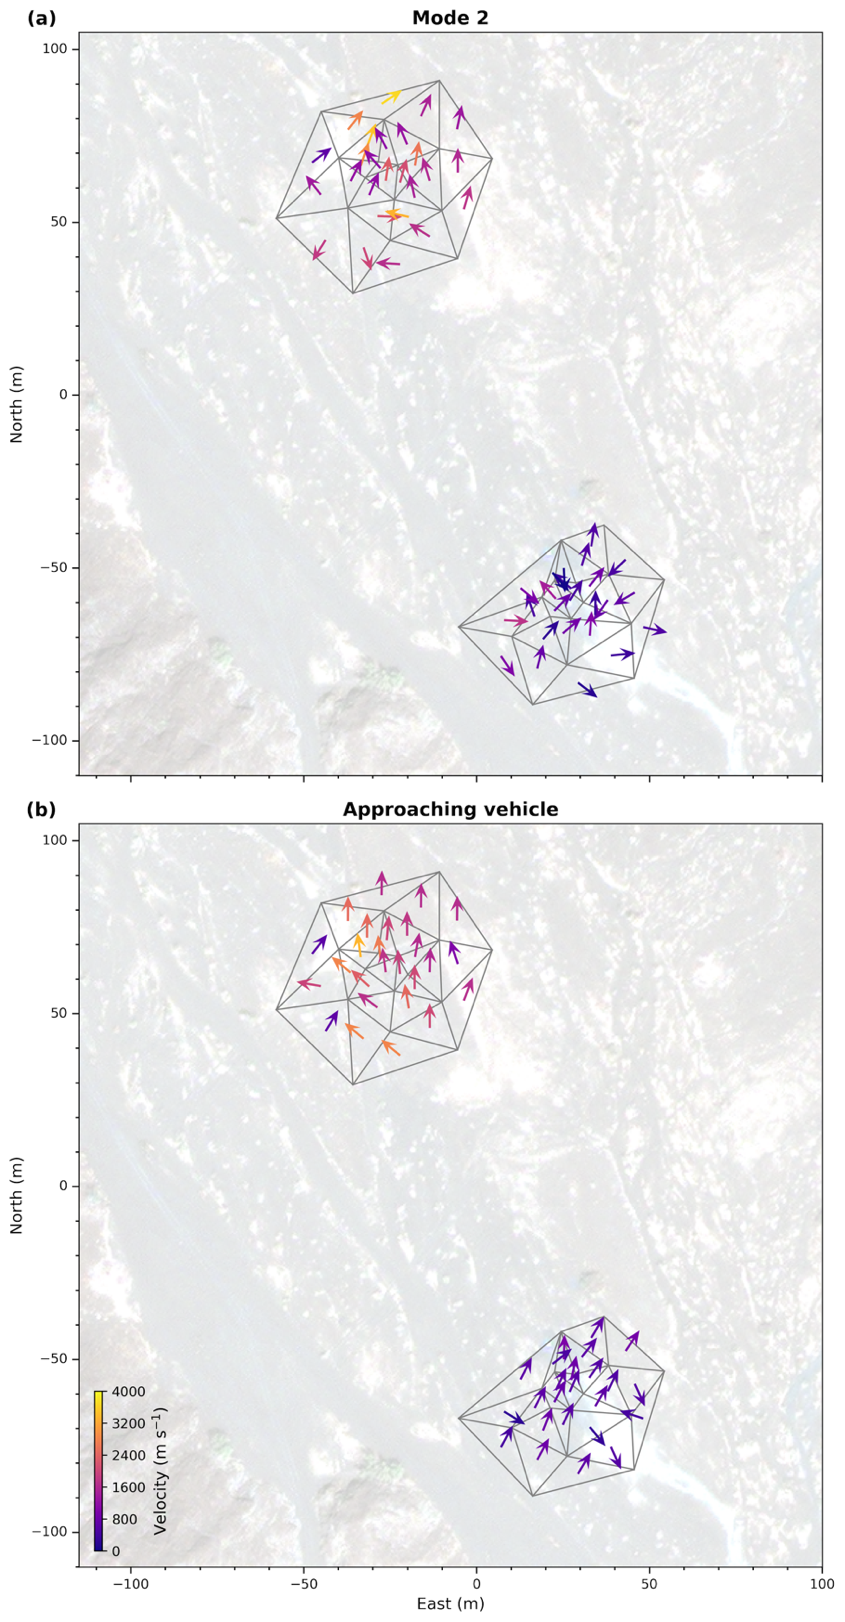


**Fig. S7.** Time-averaged propagation vectors color-coded by apparent velocity of (a) the signals from Mode 2 of the tremors (same as in Fig. 3a) and (b) a vehicle approaching from the south. Only the horizontal component with the smaller variance is plotted (Materials and Methods).


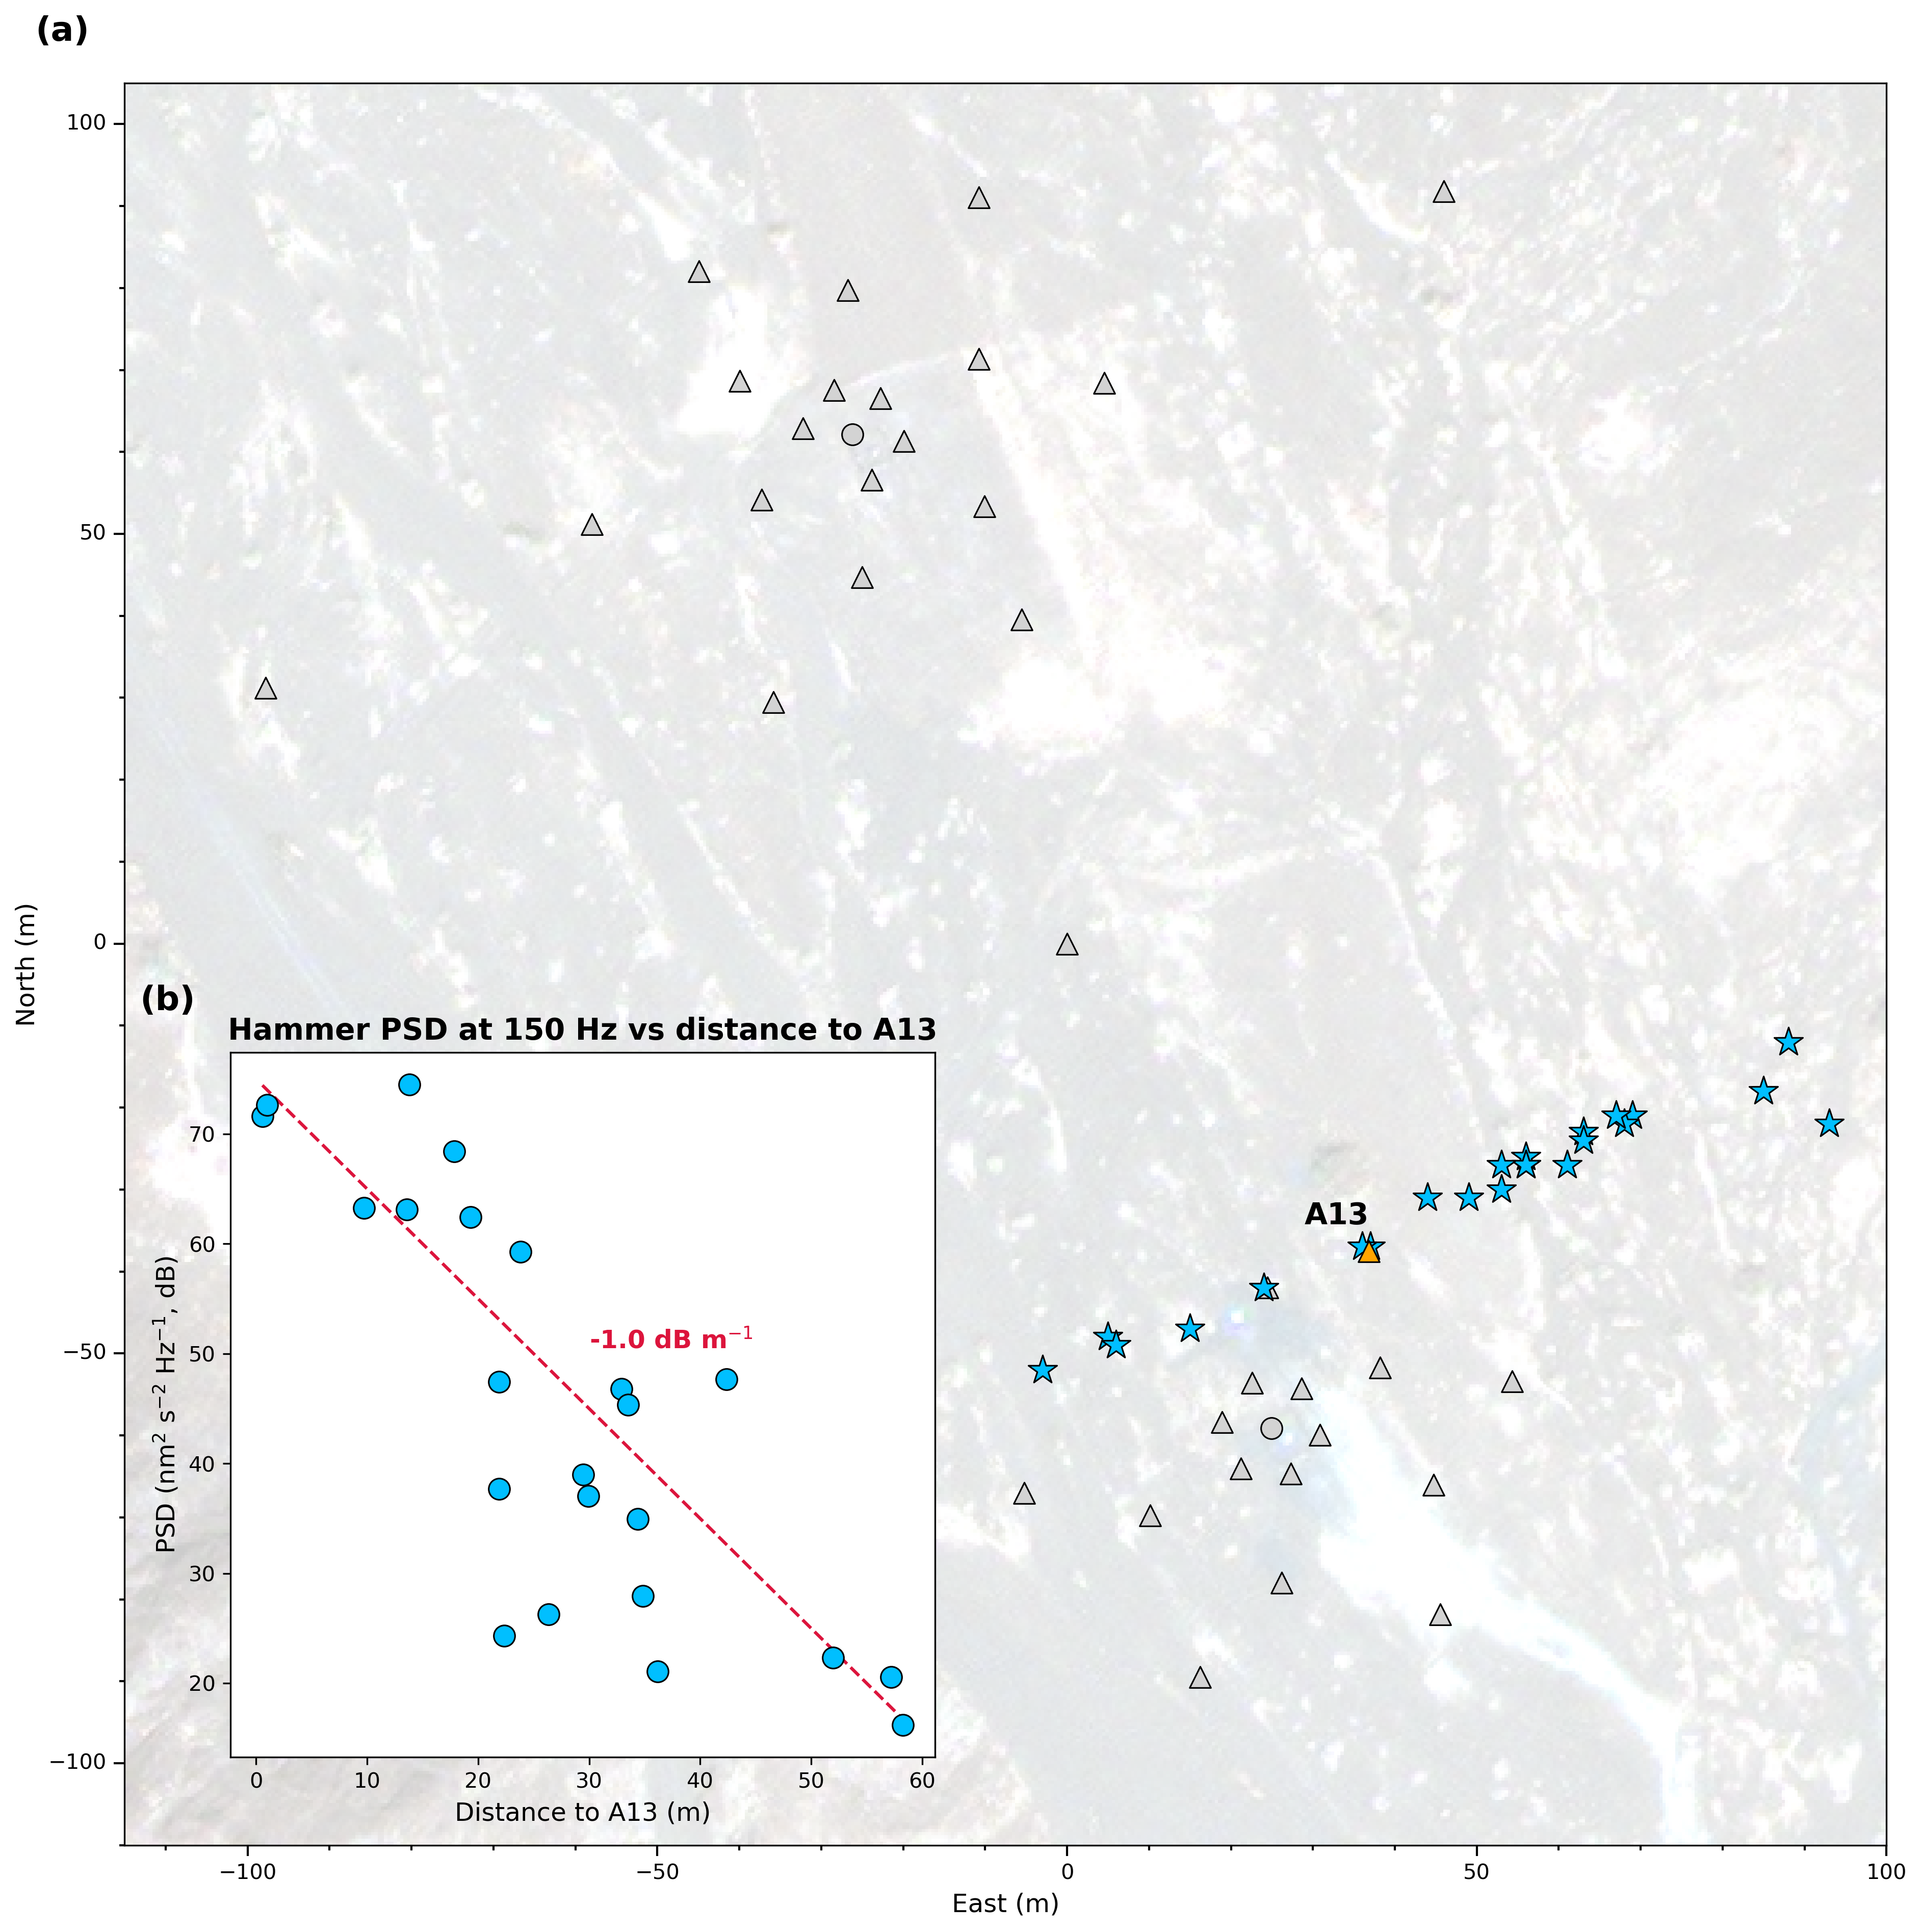
**Fig. S8.** Decay rate of seismic energy at 150 Hz revealed by hammer-shot signals recorded on A13. (a) Locations of A13 (orange triangle) and hammer shots (stars). (b) PSD of the hammer-shot signals at 150 Hz as a function of distance to A13.


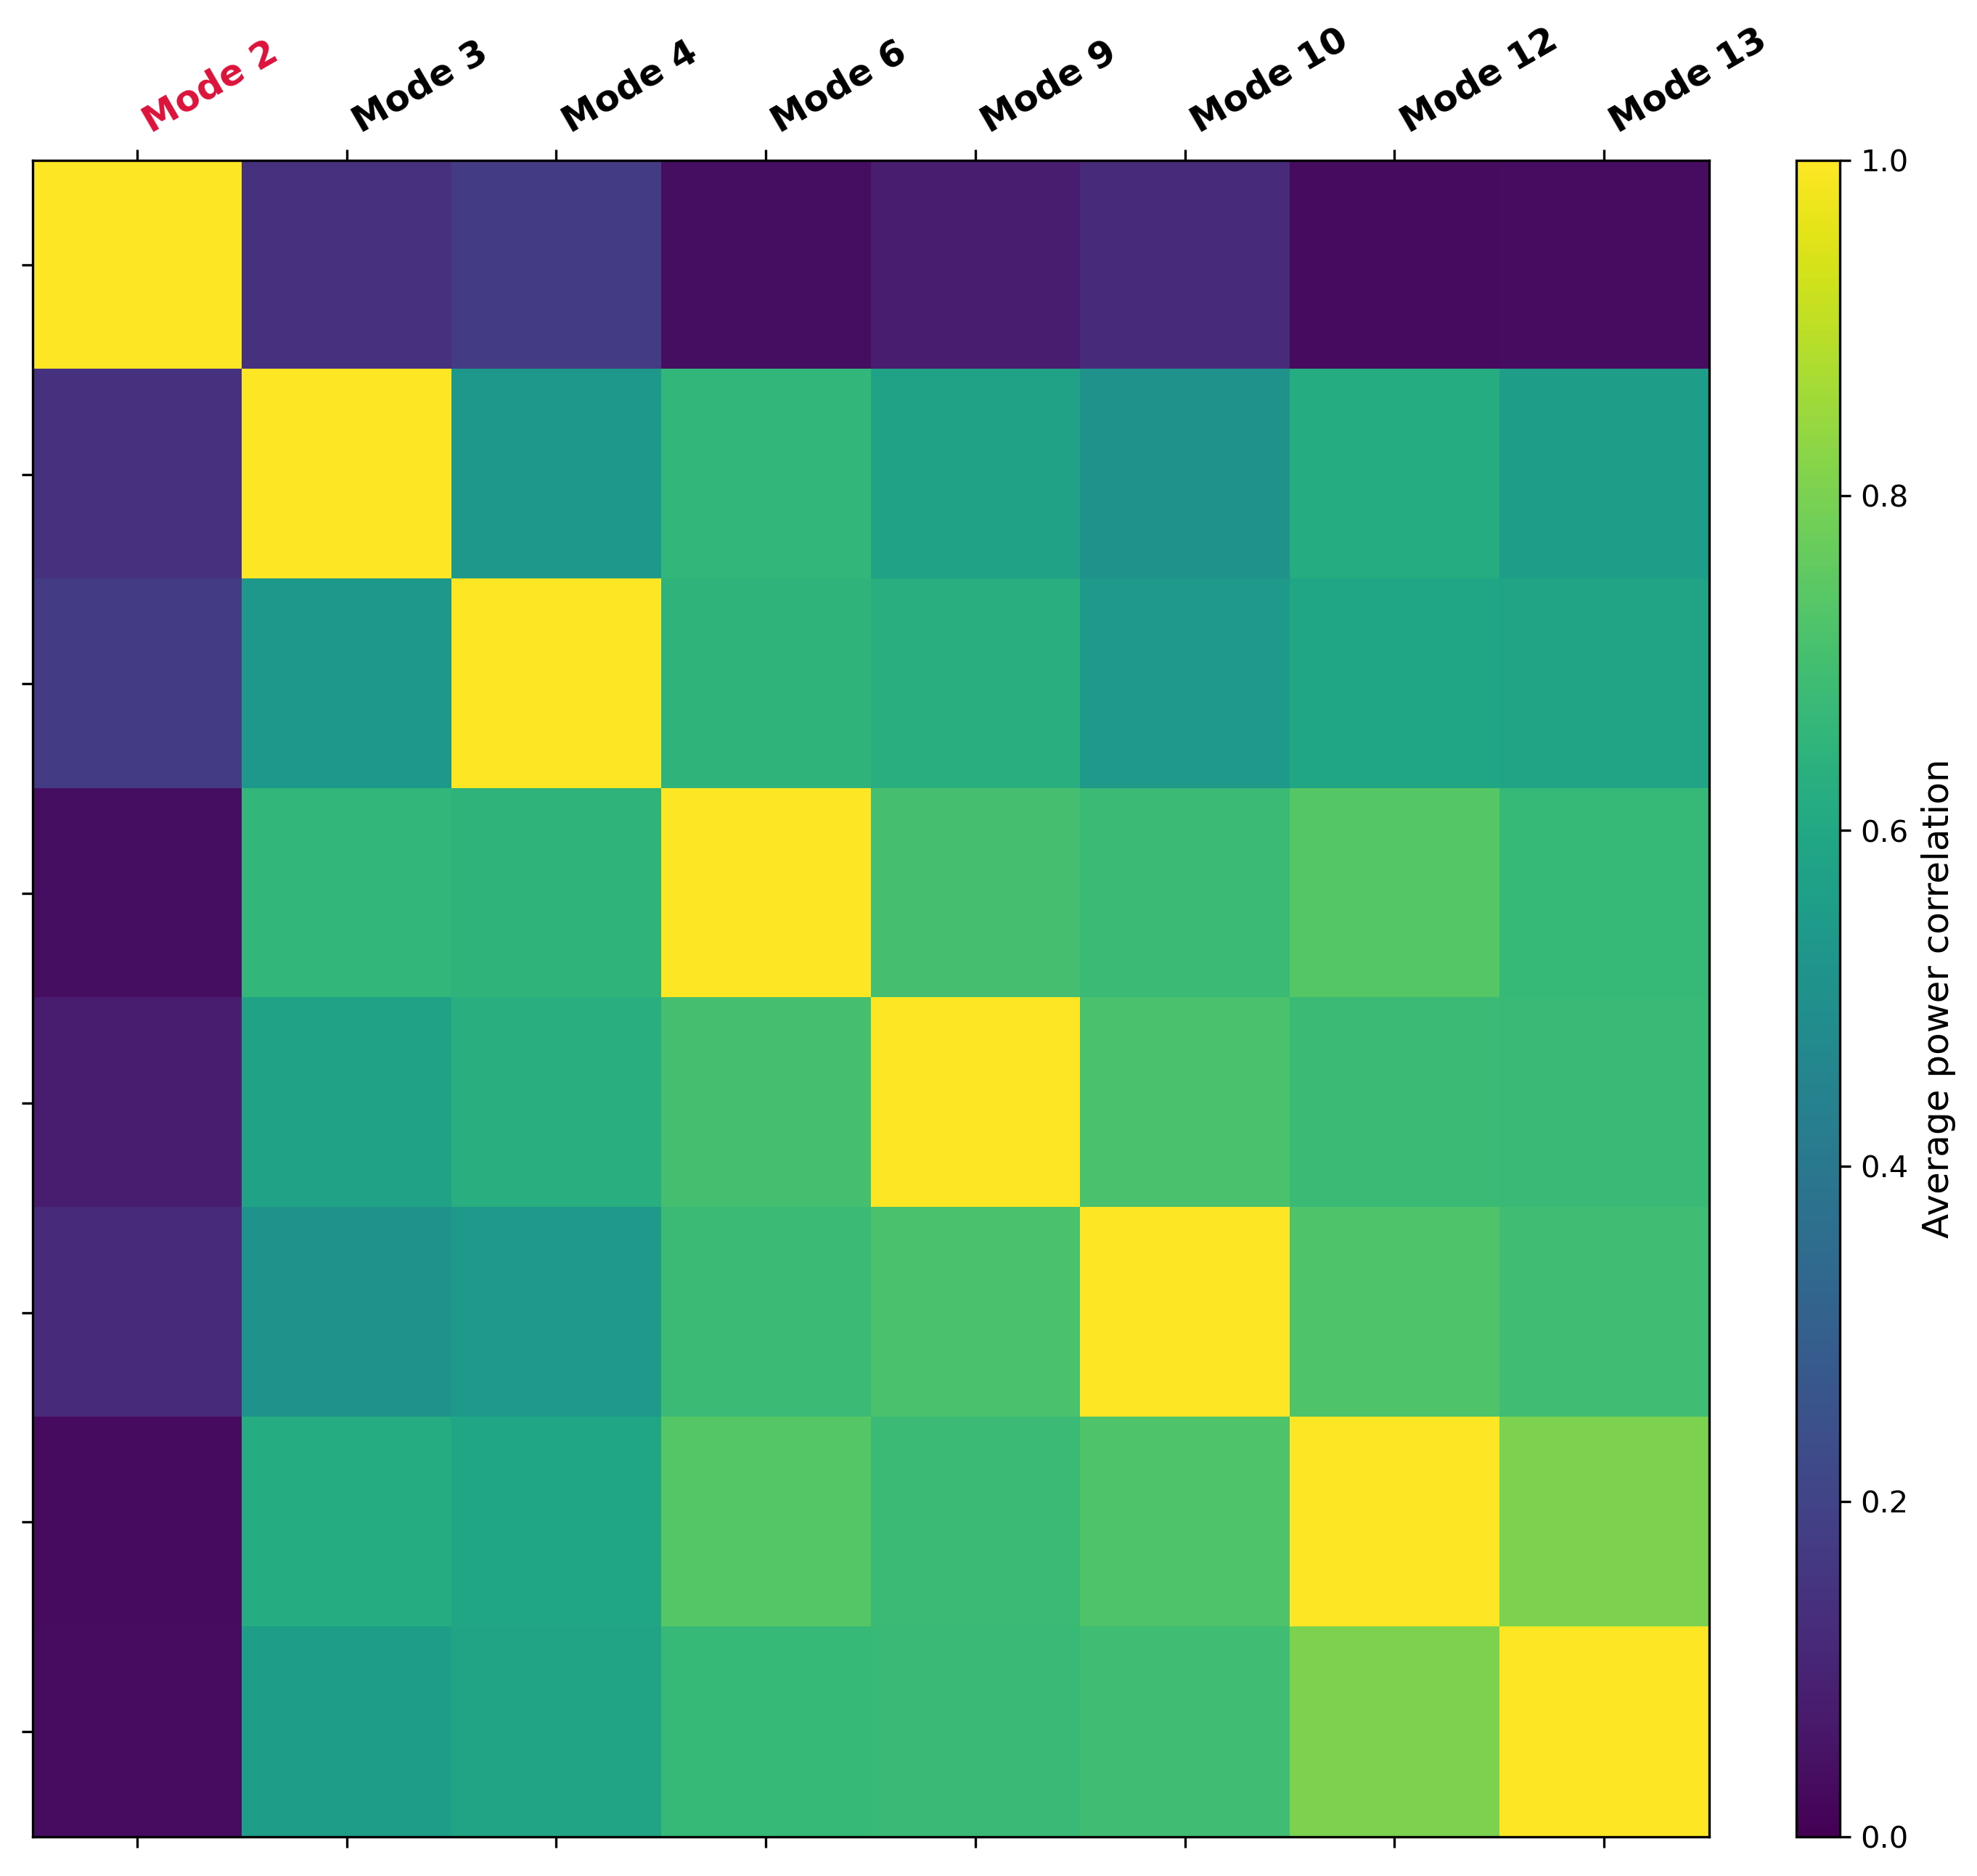


**Fig. S9.** Power correlation matrix (Materials and Methods) of Modes 2, 3, 4, 6, 9, 10, 12, and 13 averaged over all geophones.


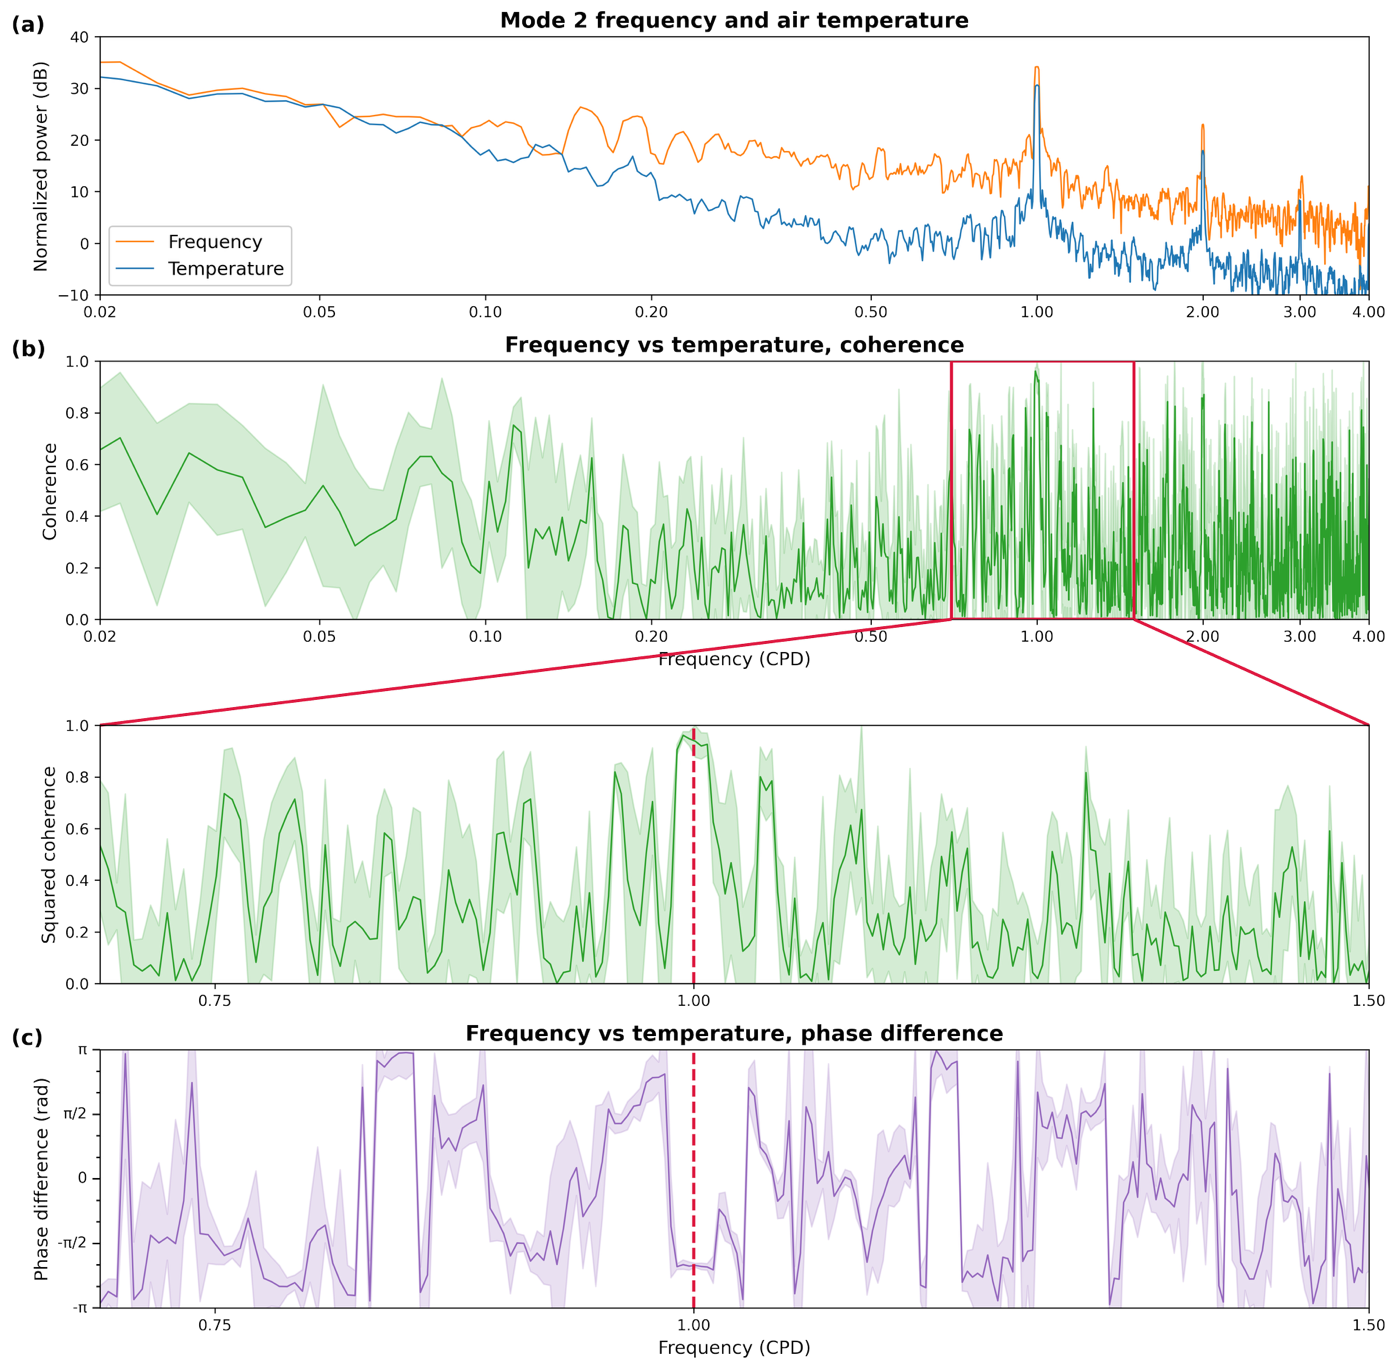
**Fig. S10.** Cross-spectral analysis of Mode-2 frequency and air temperature. CPD: cycle-per-day. (a) Power spectral densities (Materials and Methods) of the frequency of Mode 2 (orange) and temperature (blue). (b) and (c) Cross-spectral squared coherence (green) and phase difference (purple) between the frequency of Mode 2 and temperature, with the bottom two panels highlighting the range around 1 CPD. A positive phase difference indicates frequency leading temperature. Transparent colored areas indicate uncertainties.


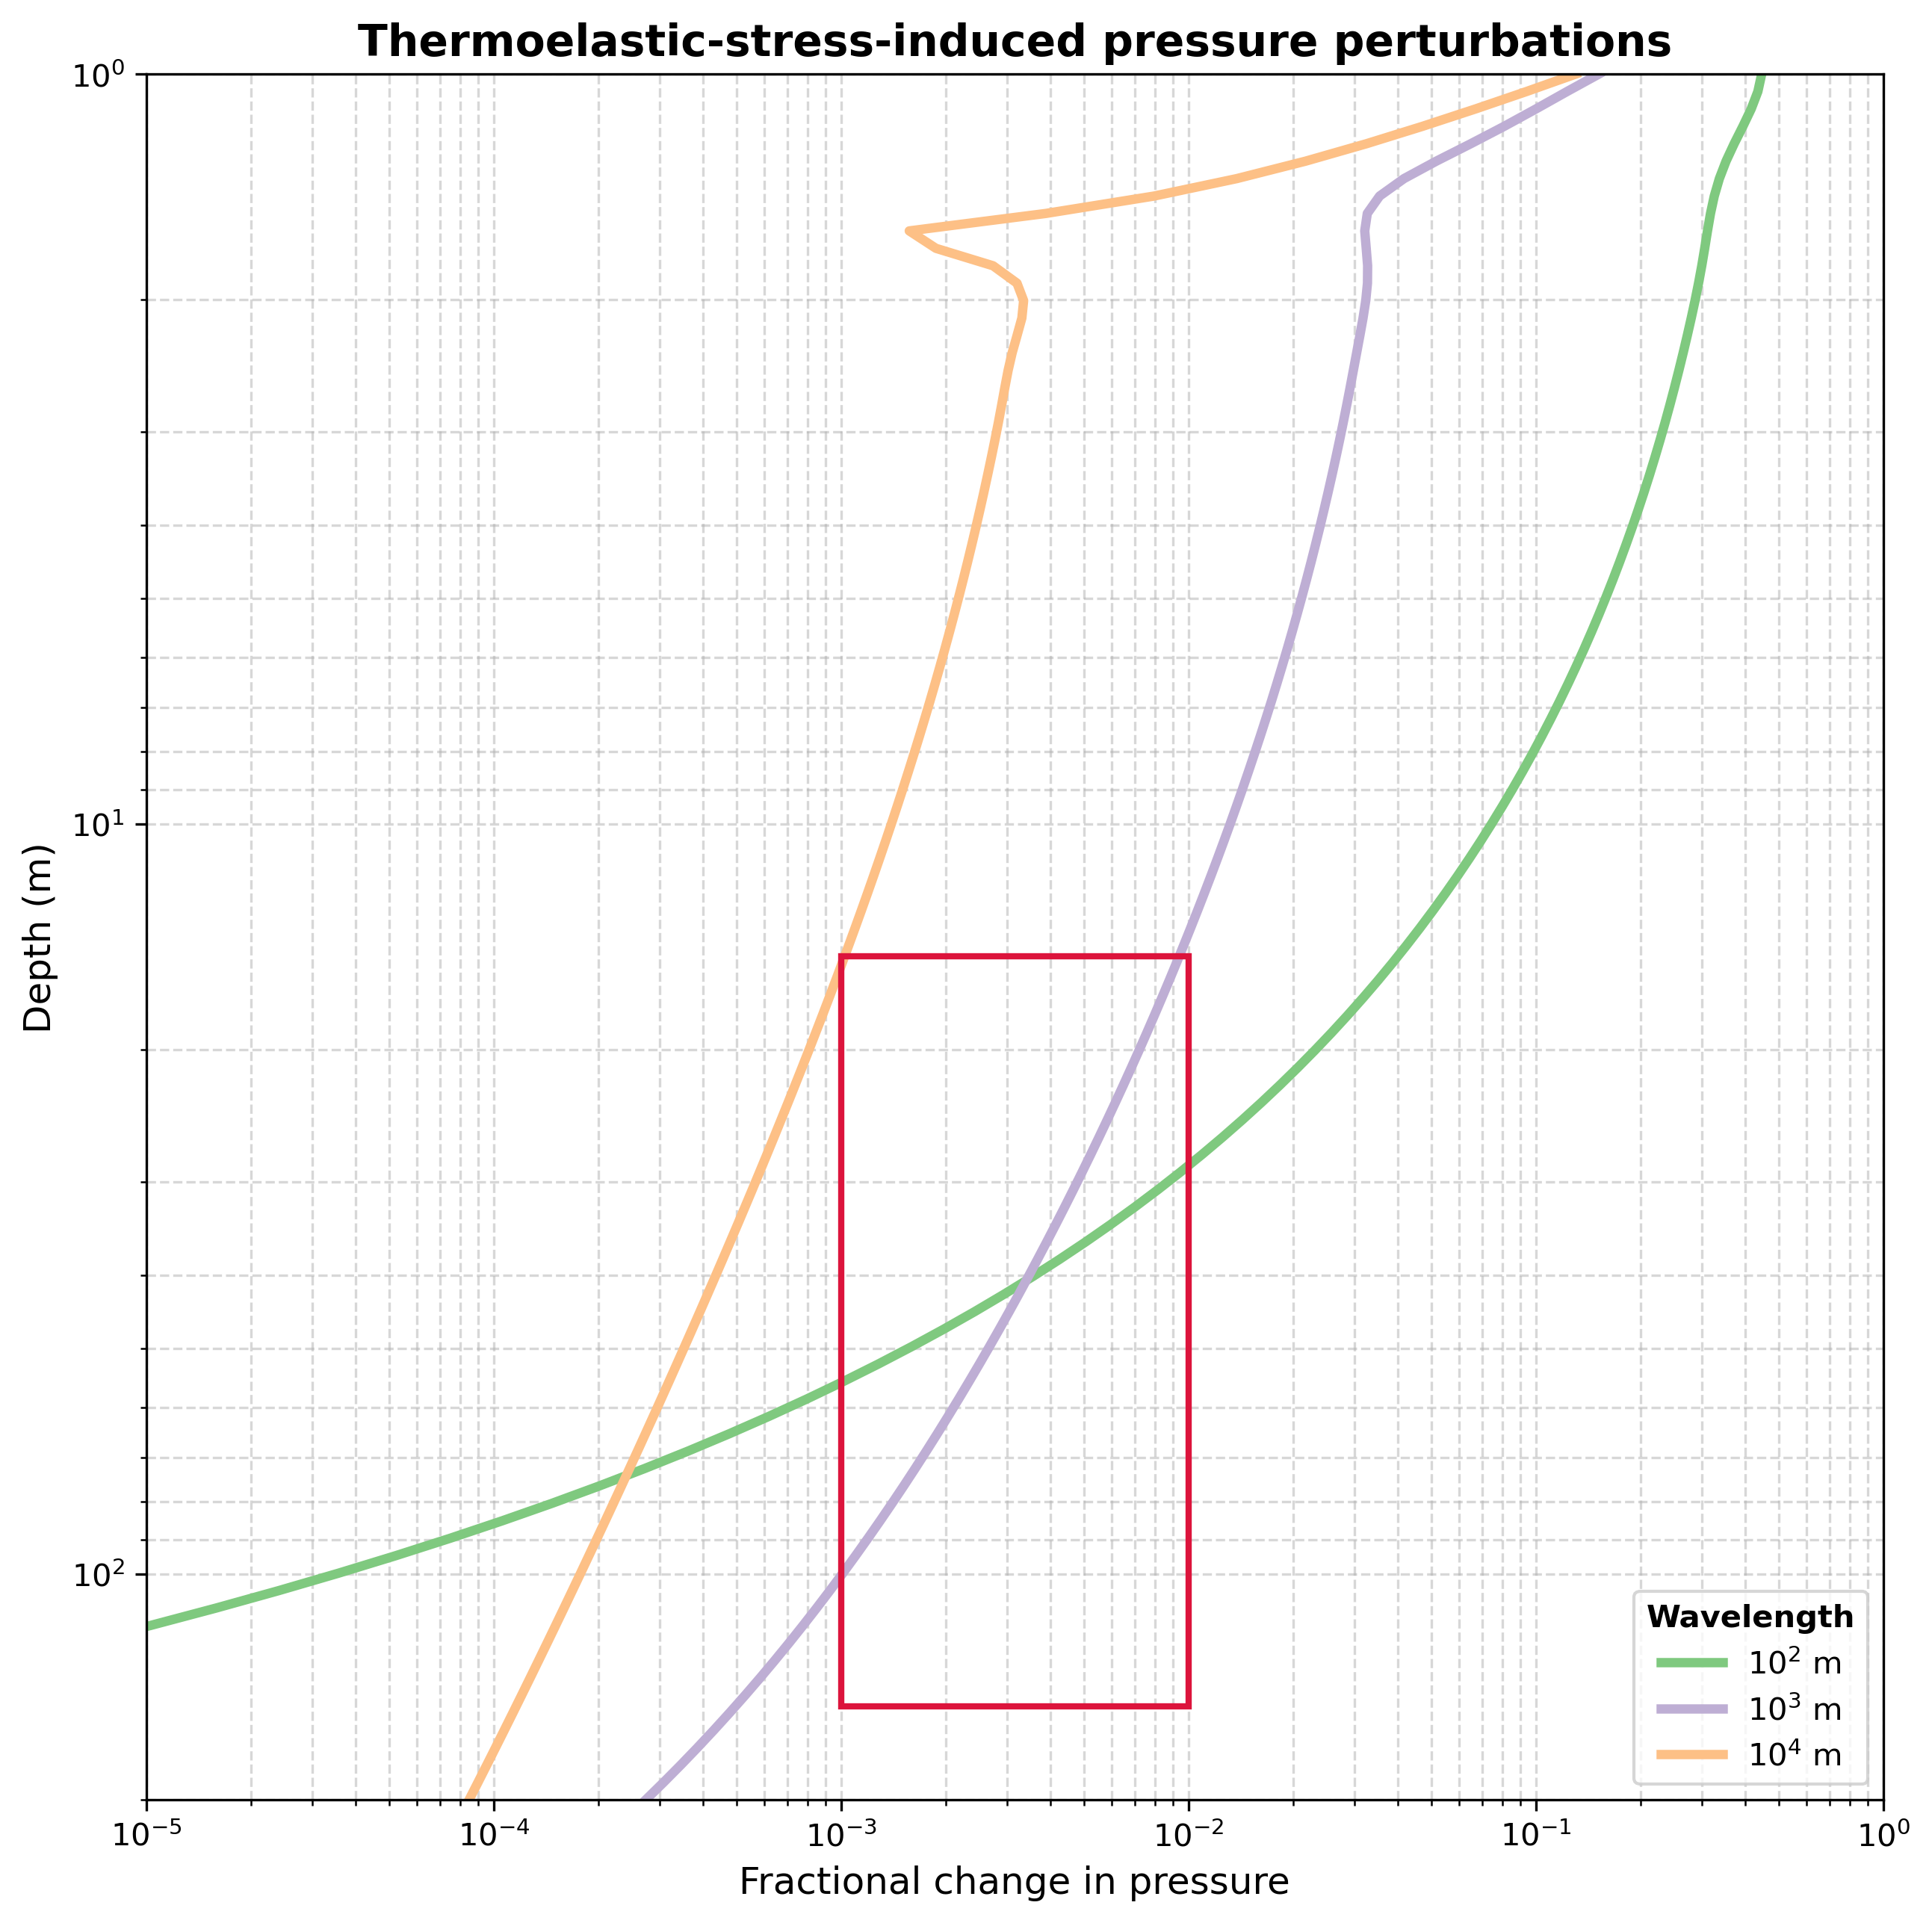
**Fig. S11.** Thermoelastic-stress induced pressure perturbations as functions of depths for three horizontal wavelengths of surface-temperature anomalies. The red box highlights the observed range of fractional frequency variation and likely depth range of the source.

**Table S1.**

Frequency ranges for extracting the resonance modes

| Mode order | Min. frequency (Hz) | Max. frequency (Hz) |
| --- | --- | --- |
| 2 | 25.385 | 25.569 |
| 3 | 38.103 | 38.353 |
| 4 | 50.804 | 51.121 |
| 6 | 76.240 | 76.640 |
| 8 | 101.758 | 102.209 |
| 9 | 114.543 | 114.943 |
| 10 | 127.327 | 127.694 |
| 11 | 139.962 | 140.512 |
| 12 | 152.629 | 153.246 |
| 13 | 165.330 | 165.864 |
| 14 | 178.265 | 178.732 |
| 15 | 190.866 | 191.516 |

**Table S2.**

Parameters for computing the effective sound speed of the fluid mixture in the crack

| Molar mass of hydrogen *M* (kg mole-1) | 2.016×10-3 |
| --- | --- |
| Adiabatic index of hydrogen γ | 1.4 |
| Gas constant *R* (J K-1 mole-1) | 8.315 |
| Surface temperature *T0*(K) | 273.16 |
| Sound speed of water *cw* (m s-1) | 1500 |
| Density of water ρw (kg m-3) | 1000 |
| P wave velocity of rock matrix *vp* (m s-1) | 4000 |
| Density of rock matrix ρs (kg m-3) | 2500 |
| Gravitational acceleration *g* (m s-2) | 10 |
